# Supplementary material for: Baicalein attenuates OVA-induced allergic airway inflammation through the inhibition of the NF-κB signaling pathway
Source: publisher site journal article supplement (doi:10.18632/aging.102371), 2019-11-06
Supplement: Supplementary file [file aging-v11i21-102371-supplementary-material-SD2.pdf]

## SUPPLEMENTARY TABLE

**Supplementary Table 1. Primers used for real-time qPCR assay.**

| <b>Gene</b>           | <b>Species</b> | <b>FW</b>             | <b>RW</b>             |
|-----------------------|----------------|-----------------------|-----------------------|
| IL-4                  | Mouse          | GGAACAAAGACCTGTGGGGT  | GGCATCGAAAAGCCCGAAAG  |
| IL-5                  | Mouse          | TCCTCTTCGTTGCATCAGGG  | TGTGGCTGGCTTCATTAC    |
| IL-13                 | Mouse          | TGCCATCTACAGGACCCAGA  | CTCATTAGAAGGGGCCGTGG  |
| MUC5AC                | Mouse          | TCTACTGACTGCACCAACACA | CCACACTTTCGCAGCTCAAC  |
| MUC5B                 | Mouse          | GATTCGGCCGAGGCAAGTA   | GAGGCCAAAACAGCCAACAG  |
| MMP9                  | Mouse          | TCTTCTGGCGTGTGAGTTTCC | CGGTTGAAGCAAAGAAGGAGC |
| Collagen I            | Mouse          | TGGCCTTGGAGGAAACTTTG  | CTTGGAAACCTTGTGGACCAG |
| I $\kappa$ B $\alpha$ | Mouse          | TGAAGGACGAGGAGTACGAGC | TGCAGGAACGAGTCTCCGT   |
| $\beta$ -actin        | Mouse          | CCGTGAAAAGATGACCCAGA  | TACGACCAGAGGCATACAG   |
| I $\kappa$ B $\alpha$ | Human          | ACCTGGTGTCACTCCTGTTGA | CTGCTGCTGTATCCGGGTG   |
| $\beta$ -actin        | Human          | CCTGGCACCCAGCACAAAT   | GCCGATCCACACGGAGTACT  |
